# Supplementary material for: Insights into the Divergence of Chinese Ips Bark Beetles during Evolutionary Adaptation
Source: MDPI journal article supplement (doi:10.3390/biology11030384), 2022-02-28
Supplement: s1 [file s1]

## Supplementary material

**Table S1.** The list of sample informaton of mitchondrial genomes of 26 published species of Scolytidae.

| Subfamily   | Tribe         | Category              | Species                          | Accession no. |
|-------------|---------------|-----------------------|----------------------------------|---------------|
| Hylesininae | Hylastini     | <i>Hylates</i>        | <i>Hylates attenuatus</i>        | NC_036290.1   |
| Hylesininae | Hylastini     | <i>Hylates</i>        | <i>Hylates brunneus</i>          | NC_036262.1   |
| Ipinae      | Ipini         | <i>Pityogenes</i>     | <i>Pityogenes trepanatus</i>     | KX_035225.1   |
| Ipinae      | Ipini         | <i>Pityogenes</i>     | <i>Pityogenes bidentatus</i>     | NC_036289.1   |
| Ipinae      | Ipini         | <i>Ips</i>            | <i>Ips calligraphus</i>          | MW_589547     |
| Ipinae      | Ipini         | <i>Ips</i>            | <i>Ips acuminatus</i>            | MK_988441     |
| Ipinae      | Ipini         | <i>Ips</i>            | <i>Ips sexdentatus</i>           | NC_036281.1   |
| Ipinae      | Ipini         | <i>Orthotomicus</i>   | <i>Orthotomicus erosus</i>       | MZ_823388     |
| Ipinae      | Ipini         | <i>Orthotomicus</i>   | <i>Orthotomicus laricis</i>      | NC_036291.1   |
| Ipinae      | Dryocoetini   | <i>Dryocoetes</i>     | <i>Dryocoetes autographus</i>    | NC_036287.1   |
| Ipinae      | Dryocoetini   | <i>Dryocoetes</i>     | <i>Dryocoetes hectographus</i>   | MZ_766132     |
| Ipinae      | Dryocoetini   | <i>Dryocoetes</i>     | <i>Dryocoetes villosus</i>       | NC_036282.1   |
| Ipinae      | Xyleborini    | <i>Cyclorhipidion</i> | <i>Cyclorhipidion bodoanus</i>   | NC_036295     |
| Ipinae      | Xyleborini    | <i>Xylosandrus</i>    | <i>Xylosandrus saxesenii</i>     | KX035203.1    |
| Ipinae      | Xyleborini    | <i>Anisandrus</i>     | <i>Anisandrus dispar</i>         | NC_036293.1   |
| Ipinae      | Xyleborini    | <i>Xylosandrus</i>    | <i>Xylosandrus morigerus</i>     | NC_036283.1   |
| Ipinae      | Xyleborini    | <i>Xylosandrus</i>    | <i>Xylosandrus germanus</i>      | NC_036280.1   |
| Ipinae      | Xyleborini    | <i>Xylosandrus</i>    | <i>Xylosandrus crassiusculus</i> | NC_036284.1   |
| Ipinae      | Xyloterini    | <i>Trypodendron</i>   | <i>Trypodendron signatum</i>     | NC_036292.1   |
| Ipinae      | Xyloterini    | <i>Trypodendron</i>   | <i>Trypodendron domesticum</i>   | NC_036286.1   |
| Ipinae      | Polygraphini  | <i>Polygraphus</i>    | <i>Polygraphus poligraphus</i>   | OK_110248     |
| Ipinae      | Tryphphloeini | <i>Trypophloeus</i>   | <i>Trypophloeus asperatus</i>    | NC_036285.1   |
| Ipinae      | Corthylini    | <i>Gnathotrachus</i>  | <i>Gnathotrachus materiarius</i> | NC_036294.1   |
| Ipinae      | Corthylini    | <i>Pityophthorus</i>  | <i>Pityophthorus pubescens</i>   | NC_036288.1   |
| Ipinae      | Hyloterini    | <i>Dendroctonus</i>   | <i>Dendroctonus micans</i>       | MZ_768861     |
|             |               | <i>Curculio</i>       | <i>Curculio elephas</i>          | KX_087269.1   |

**Table S2.** *Ips* species used in this study.

| species                              | Collection locality,data and collector                                                                                    | Host                    | Preservation method | Genbank Accession No. |
|--------------------------------------|---------------------------------------------------------------------------------------------------------------------------|-------------------------|---------------------|-----------------------|
| <i>Ips acuminatus</i> (Gyllenhal)    | Czech Republic: Moravia, Tulasice V-1995. M. Knizek                                                                       | Unrecorded              | Frozen              | AF113325              |
| <i>Ips amitinus</i> 1 (Eichhoff)     | Czech Republic: Moravia, Chuchelna V-1995. M. Knizek                                                                      | <i>Picea abies</i>      | Ethanol             | AF113326              |
| <i>Ips amitinus</i> 2                | Russia: Lenbolovo, St. Petersburg Reg. 8-10-VIII-1998.M. Mandelstan                                                       | Spruce                  | Ethanol             | AF113327              |
| <i>Ips apache</i> 1 (Lanier)         | AZ: Cochise Co. Coronado National Forest. Rd 42, 10 mi NW of Portal. 6-IX-1996.                                           | <i>Pinus engelmanni</i> | Frozen              | AF113328              |
| <i>Ips apache</i> 2                  | Mexico: Michoacan: Uruapan. Barranca del Cupatitzio 1996. A. Storer                                                       | Unrecorded              | Ethanol             | AF113329              |
| <i>Ips avulsus</i> 1 (Eichhoff)      | Louisiana. 1996. G. Lenhard                                                                                               | Unrecorded              | Pinned              | AF113330              |
| <i>Ips avulsus</i> 2                 | GA: Cobb Co. Marietta. 19-IX-1997. M. Caterino                                                                            | <i>Pinus</i>            | Frozen              | AF113331              |
| <i>Ips bonanseai</i> 1 (Hopkins)     | AZ: Graham Co. Coronado National Forest Rd. 366.5-IX-1996.                                                                | <i>Pinus</i>            | Frozen              | AF113332              |
| <i>Ips bonanseai</i>                 | 2 Mexico: Nuevo Leon. XII-1993. S. Seybold                                                                                | Unrecorded              | Frozen              | AF113333              |
| <i>Ips borealis Swaine</i>           | Canada: Quebec, Gatineau Park nr. Taylor Lake.20-V-1995.                                                                  | <i>Picea glauca</i>     | Frozen              | AF113334              |
| <i>Ips calligraphus</i> 1 (Germer)   | NY: Suffolk Co. Smithtown 11-IX-1994.                                                                                     | <i>Pinus strobus</i>    | Frozen              | AF113335              |
| <i>Ips calligraphus</i> 2            | AZ: Gila Co. 14 mi. S. Young 26-XI-1985. G. N. Lanier                                                                     | <i>Pinus ponderosa</i>  | Pinned              | AF113336              |
| <i>Ips cembrae</i> 1 (Heer)          | Czech Republic: Moravia, Resice. 15-V-1997. M. Knizek                                                                     | <i>Larix decidua</i>    | Ethanol             | AF113337              |
| <i>Ips cembrae</i> 2                 | France: Briançon, 16-VI-1996. A. Roques                                                                                   | <i>Larix decidua</i>    | Ethanol             | AF113338              |
| <i>Ips cembrae</i> 3                 | China: Heilongjiang, Lo-Shan. 1-VI-1996. A. Roques                                                                        | <i>Larix gmelini</i>    | Ethanol             | AF113339              |
| <i>Ips concinnus</i> (Mannerheim)    | WA: Clallam Co. Hoh River Rd. 28-VI-1997.                                                                                 | <i>Picea sitchensis</i> | Frozen              | AF113340              |
| <i>Ips confusus</i> 1 (LeConte)      | AZ: Gila Co. San Carlos Indian Reservation. 11 mi. NE of Point of Pines 26-V-1993. S. Seybold, A. I. Cognato & D. L. Wood | <i>Pinus edulis</i>     | Frozen              | AF113341              |
| <i>Ips confusus</i> 2                | NV: Douglas Co. Gardnerville. II-1994. S. Seybold.                                                                        | <i>Pinus monophylla</i> | Frozen              | AF113342              |
| <i>Ips cribricollis</i> 1 (Eichhoff) | NM: Otero Co. Lincoln National Forest Rt. 82 8.05 km E. Cloudcroft, 11-V-1994.E.                                          | <i>Pinus ponderosa</i>  | Frozen              | AF113343              |
| <i>Ips cribricollis</i> 2            | Mexico: Michoacan: San Juan Nuevo, LaPila Forest,31-V-1998. A. I. Cognato & A. Del Rio-Morea                              | <i>Pinus leiophylla</i> | Ethanol             | AF113344              |
| <i>Ips duplicatus</i> 1 (Sahlberg)   | Czech Republic: Moravia, Chuchelna. V-1995. M.Knizek                                                                      | <i>Picea abies</i>      | Ethanol             | AF113345              |
| <i>Ips duplicatus</i> 2              | Russia: Lenbolovo, St. Petersburg Reg. 8-10-VIII-1998.M. Mandelstan                                                       | Spruce                  | Ethanol             | AF113346              |
| <i>Ips emarginatus</i> 1             | CA: Lassen Co. Black's Mountain Experimental Forest. VII-1994. S.                                                         | <i>Pinus</i>            | Frozen              | AF113347              |

|                                         |                                                                                                              |                           |         |          |
|-----------------------------------------|--------------------------------------------------------------------------------------------------------------|---------------------------|---------|----------|
| (LeConte)                               | Seybold, A. I. Cognato & D. L. Wood                                                                          | <i>ponderosa</i>          |         |          |
| <i>Ips emarginatus</i> 2                | WA: Kittitas Co. Roslyn. 30-VI-1997.                                                                         | <i>Pinus ponderosa</i>    | Frozen  | AF113348 |
| <i>Ips grandicollis</i> 1<br>(Eichhoff) | NY: Suffolk Co. Brookhaven. 28-VIII-1992                                                                     | <i>Pinus rigida</i>       | Frozen  | AF113349 |
| <i>Ips grandicollis</i> 2               | Canada: Ontario: Constance Bay, Turbolton Forest.13-V-1995.                                                  | <i>Pinus banksiana</i>    | Pinned  | AF113350 |
| <i>Ips grandicollis</i> 3               | FL: Pinellas Co., Harpon Spring, Howard Park.12-V-1995. D. Czokajlo                                          | Unrecorded                | Pinned  | AF113351 |
| <i>Ips hauseri</i> Reitter              | USSR: Kazachstan. Isyk 1767m Zailij. Ala Tau.29-V-1974. A. Pfeffer Igt.                                      | Unrecorded                | Pinned  | AF113352 |
| <i>Ips hoppingi</i> 1<br>Lanier         | Mexico: Nuevo Leon Mpio. Galeana Rd. Galeana-Dr.Arroyo, Las Crucites 2,470m. X-1993. S. Seybold              | <i>Pinus cembroides</i>   | Frozen  | AF113353 |
| <i>Ips hoppingi</i> 2                   | AZ: Cochise Co. Coronado N.F. Rd. 42 10mi NW. Portal.7-IX-1996.                                              | <i>Pinus cembroides</i>   | Frozen  | AF113354 |
| <i>Ips hunteri</i> Swaine               | AZ: Greenlee Co. Rd. 191, 3 mi. N. Hannangan's Meadow. 3-IX-1996.                                            | <i>Picea pugnens</i>      | Frozen  | AF113355 |
| <i>Ips integer</i><br>(Eichhoff)        | AZ: Greenlee Co. Rd. 191, 7 mi. S. Hannangan's Meadow. 1-IX-1996.                                            | <i>Pinus ponderosa</i>    | Frozen  | AF113356 |
| <i>Ips knausi</i> Swaine                | CO: Fairfield nr. Payosa Springs N. Jose. VII-1994. S.Kelley                                                 | <i>Pinus ponderosa</i>    | Ethanol | AF113357 |
| <i>Ips latidens</i> 1<br>(Leconte)      | CA: Mariposa Co. Fish Camp 15-IV-1996.                                                                       | <i>Pinus lambertinan</i>  | Frozen  | AF113358 |
| <i>Ips latidens</i> 2                   | WA: Roslyn. 30-VI-1997.                                                                                      | <i>Pinus ponderosa</i>    | Frozen  | AF113359 |
| <i>Ips lecontei</i> 1<br>Swaine         | AZ: Gila Co. San Carlos Indian Reservation. Point of Pines 27-V-1993. S. Seybold, A. I. Cognato & D. L. Wood | <i>Pinus ponderosa</i>    | Frozen  | AF113360 |
| <i>Ips lecontei</i> 2                   | AZ: Greenlee Co. Apache National Forest Rd. 191, 20 mi N.Morceani. 4-IX-1996.                                | <i>Pinus ponderosa</i>    | Frozen  | AF113361 |
| <i>Ips longifolia</i><br>(Stebbing)     | Bhutan: Autsu Lhuntshi. 1100 m. 9-X-1985. H. Schmutzenhofer                                                  | Chir pine                 | Pinned  | AF113362 |
| <i>Ips mannsfeldi</i><br>(Wachtl)       | Austria: Vienna. VI-1989. C. Stauffer                                                                        | Unrecorded                | Ethanol | AF113363 |
| <i>Ips mexicanus</i><br>(Hopkins)       | CA: Marin Co. Olema. 8-III.1994.                                                                             | <i>Pinus muricata</i>     | Frozen  | AF113364 |
| <i>Ips montanus</i><br>(Eichhoff)       | CA: Modoc Co. Warner Mountains, T44N, R15E, N1/2, S17.25-VII-1994. S. Seybold, A. I. Cognato, D. L. Wood.    | <i>Pinus monticola</i>    | Frozen  | AF113365 |
| <i>Ips nobilis</i><br>(Wollaston)       | Canary Islands: Tenerife. Villaflor. 12-III-1993. M. Knizek.                                                 | Unrecorded                | Pinned  | AF113366 |
| <i>Ips paraconfusus</i> 1<br>Lanier     | CA: Alameda Co. Berkeley. Wildcat Cayon Rd. 14-X-1995.                                                       | <i>Pinus radiata</i>      | Frozen  | AF113367 |
| <i>Ips paraconfusus</i> 2<br>Lanier     | CA: Mariposa Co. Fish Camp 15-IV-1996.                                                                       | <i>Pinus lambertinana</i> | Frozen  | AF113368 |
| <i>Ips perroti</i> Swaine               | Canada: Ontario: Constance Bay, Torbolton Forest. 13-V-1995                                                  | <i>Pinus bankisana</i>    | Frozen  | AF113369 |

|                                      |                                                                                                        |                           |         |          |
|--------------------------------------|--------------------------------------------------------------------------------------------------------|---------------------------|---------|----------|
| <i>Ips perturbatus</i> 1 (Eichhoff)  | Canada: Ontario: Muni. of Ottawa-Carleton, Marlborough Forest, 19-V-1995. D. E. Bright & A. I. Cognato | <i>Picea glauca</i>       | Frozen  | AF113370 |
| <i>Ips perturbatus</i> 2, 3          | Canada: Alberta. nr Manning. VIII-1996. D. Langor                                                      | <i>Picea glauca</i>       | Ethanol | AF113371 |
| <i>Ips perturbatus</i> 2, 3          | Canada: Alberta. nr Manning. VIII-1996. D. Langor                                                      | <i>Picea glauca</i>       | Ethanol | AF113372 |
| <i>Ips pilifrons</i> 1 Swaine        | AZ: Greenlee Co. Rd. 191, 7 mi. S. Hannangan's Meadow. 1-IX-1996                                       | <i>Picea engelmannii</i>  | Frozen  | AF113373 |
| <i>Ips pilifrons</i> 2               | CO: Larimer Co. Roosevelt N.F., Hwy 14 10,000 ft. 18-VI-1997                                           | <i>Picea engelmannii</i>  | Frozen  | AF113374 |
| <i>Ips pini</i> 1 (Say)              | NM: Otero Co. Lincoln N.F. 11-V-1994.                                                                  | <i>Pinus ponderosa</i>    | Frozen  | AF113375 |
| <i>Ips pini</i> 2                    | AZ: Apache Co. Apache N.F. Rd. 56. 3-IX-1996.                                                          | <i>Pinus ponderosa</i>    | Frozen  | AF113376 |
| <i>Ips pini</i> 3                    | Canada: Calgary 9-X-1990. J. Bordan                                                                    | <i>Pinus contorta</i>     | Ethanol | AF113377 |
| <i>Ips plastographus</i> (LeConte)   | CA: Marin Co. Inverness 14-VIII-1995.                                                                  | <i>Pinus muricata</i>     | Frozen  | AF113378 |
| <i>Ips schmutzenhoferi</i> Holzschuh | Bhutan: Chelaila, 3100 m. 5-VI-1986. H. Schmutzenhofer                                                 | <i>Larix griffithiana</i> | Pinned  | AF113379 |
| <i>Ips sexdentatus</i> (Boerner)     | Czech Republic: Moravia, Tulasice V-1995. M. Knizek                                                    | Unrecorded                | Ethanol | AF113380 |
| <i>Ips spinifer</i> (Eichhoff)       | CA: Contra Costa Co. Diablo 3-IX-1995.                                                                 | <i>Pinus sabiniana</i>    | Frozen  | AF113381 |
| <i>Ips stebbingi</i> 1 Strohmeyer    | Pakistan: Swat, Utror. 3-VIII-1987. C. Holzschuh                                                       | <i>Pinus gerardiana</i>   | Pinned  | AF113382 |
| <i>Ips stebbingi</i>                 | 2 Nepal: Dhawalagiri, Kall-Gandaki-Khola, Mustang, D.Kalopani 2500-2800 m 3-VIII-1987. C. Holzschuh    | <i>Pinus gerardiana</i>   | Pinned  | AF113383 |
| <i>Ips tridens</i> (Mannerheim)      | WA: Clallam Co. Hoh River Rd. 28-VI-1997.                                                              | <i>Picea sitchensis</i>   | Frozen  | AF113384 |
| <i>Ips typographus</i> 1 (Linnaeus)  | Czech Republic: Moravia. V-1995. M. Knizek                                                             | Unrecorded                | Frozen  | AF113385 |
| <i>Ips typographus</i> 2             | Russia: Lenbolovo, St. Petersburg Reg. 8-10-VIII-1998. M.Mandelstan                                    | Spruce                    | Ethanol | AF113386 |
| <i>Ips typographus</i> 3             | Russia: St. Khekhcir environs, Khabarovsk 2-IX-1990. M.Mandelstan                                      | <i>Pinus koraiensis</i>   | Pinned  | AF113387 |
| <i>Ips woodi</i> 1 Thatcher          | AZ: Greenlee Co. Rd. 191, 7 mi. S. Hannangan's Meadow. 1-IX-1996.                                      | <i>Pinus strobiformis</i> | Frozen  | AF113388 |
| <i>Ips woodi</i> 2                   | CA: Mono Co. Inyo National Forest Crooked Creek Research Station 21-VIII-1997.                         | <i>Pinus flexilis</i>     | Frozen  | AF113389 |
| <i>Ips amitinus</i>                  | Lower Austria, Gutenbrunn                                                                              | <i>Picea abies</i>        | Ethanol | U82587   |
| <i>Ips cembrae</i>                   | Styria, Kindberg                                                                                       | <i>Larix decidua</i>      | Ethanol | U82588   |
| <i>Ips duplicatus</i>                | Moravia, Ostrau                                                                                        | <i>Picea abies</i>        | Ethanol | U82586   |
| <i>Ips acuminatus</i>                | Lower Austria, Retz                                                                                    | <i>Pinus</i>              | Ethanol | U82585   |

|                         |                                  |                   |         |          |
|-------------------------|----------------------------------|-------------------|---------|----------|
|                         |                                  | <i>silvestris</i> |         |          |
| <i>Ips subelongatus</i> | China: Hebei,Pingquan            | <i>Larix</i>      | Ethanol | KC411926 |
|                         |                                  | <i>principis</i>  |         |          |
| <i>Ips subelongatus</i> | China: Neimenggu,Aertai,Wuchagou | <i>Larix</i>      | Ethanol | KC411927 |
|                         |                                  | <i>gmelinii</i>   |         |          |
| <i>Ips subelongatus</i> | China: Heilongjiang,Menjiagang   | <i>Larix</i>      | Ethanol | KC411928 |
|                         |                                  | <i>olgensis</i>   |         |          |
| <i>Ips typographus</i>  | Belgium Arlon                    | Spruce            | Ethanol | KF846139 |
| <i>Ips typographus</i>  | Belgium Beauraing                | Spruce            | Ethanol | KF846140 |
| <i>Ips typographus</i>  | Belgium Bouillon                 | Spruce            | Ethanol | KF846141 |
| <i>Ips hoppingi</i>     | Unrecorded                       | <i>Pinus</i>      | Ethanol | EF115516 |
| <i>Ips hunteri</i>      | Unrecorded                       | Spruce            | Ethanol | EF115517 |
| <i>Ips amitinus</i>     | Unrecorded                       | Spruce            | Ethanol | EF115509 |
| <i>Ips perturbatus</i>  | Unrecorded                       | Spruce            | Ethanol | EF115521 |
| <i>Ips pilifrons</i>    | Unrecorded                       | Spruce            | Ethanol | EF115523 |
| <i>Ips shangrila</i>    | Unrecorded                       | Spruce            | Ethanol | EF115526 |
| <i>Ips tridens</i>      | Unrecorded                       | Spruce            | Ethanol | EF115528 |
| <i>Ips cembrae</i>      | Unrecorded                       | <i>Larix</i>      | Ethanol | KC514452 |
| <i>Ips cembrae</i>      | Unrecorded                       | <i>Larix</i>      | Ethanol | KC514451 |
| <i>Ips nitidus</i>      | Unrecorded                       | Spruce            | Ethanol | KF846204 |
| <i>Ips nitidus2</i>     | Unrecorded                       | Spruce            | Ethanol | KF846205 |

**Table S3.** Base composition in the mitochondrial genomes of bark beetles.

| Whole genome               | Length<br>(bp) | T %   | A %   | A+T % | AT-skew | C %   | G %   | C+G % | GC-skew |
|----------------------------|----------------|-------|-------|-------|---------|-------|-------|-------|---------|
| <i>Dendroctonus micans</i> | 14,607         | 34.15 | 40.55 | 74.70 | 0.09    | 15.93 | 9.37  | 25.30 | -0.26   |
| <i>Ips nitidus</i>         | 15,409         | 35.16 | 37.97 | 73.13 | 0.04    | 16.65 | 10.22 | 26.87 | -0.24   |
| <i>Ips shangrila</i>       | 15,641         | 35.15 | 38.11 | 73.25 | 0.04    | 16.57 | 10.18 | 26.75 | -0.24   |
| <i>Ips hauseri</i>         | 15,466         | 34.83 | 37.61 | 72.43 | 0.04    | 17.42 | 10.15 | 27.57 | -0.26   |
| <i>Ips duplicatus</i>      | 15,572         | 34.59 | 37.30 | 71.89 | 0.04    | 17.74 | 10.36 | 28.11 | -0.26   |
| <i>Ips subelongatus</i>    | 15,259         | 35.76 | 38.76 | 74.52 | 0.04    | 15.73 | 9.75  | 25.48 | -0.23   |
| <i>Ips typographus</i>     | 15,384         | 35.22 | 38.22 | 73.44 | 0.04    | 16.63 | 9.93  | 26.56 | -0.25   |
| Average( <i>Ips</i> )      |                | 35.12 | 37.99 | 73.11 | 0.04    | 16.79 | 10.10 | 26.89 | -0.25   |
| Protein coding genes(PCGs) |                |       |       |       |         |       |       |       |         |
| <i>Dendroctonus micans</i> | 11,126         | 41.77 | 31.57 | 73.34 | -0.14   | 14.38 | 12.28 | 26.66 | -0.08   |
| <i>Ips nitidus</i>         | 11,190         | 41.39 | 29.71 | 71.09 | -0.16   | 15.40 | 13.51 | 28.91 | -0.07   |
| <i>Ips shangrila</i>       | 11,160         | 41.47 | 30.07 | 71.54 | -0.16   | 15.16 | 13.29 | 28.46 | -0.07   |
| <i>Ips hauseri</i>         | 11,177         | 41.07 | 29.13 | 70.20 | -0.17   | 15.96 | 13.84 | 29.80 | -0.07   |
| <i>Ips duplicatus</i>      | 11,137         | 40.59 | 29.20 | 69.79 | -0.16   | 16.38 | 13.83 | 30.21 | -0.08   |
| <i>Ips subelongatus</i>    | 11,196         | 42.42 | 30.46 | 72.88 | -0.16   | 14.19 | 12.92 | 27.12 | -0.05   |
| <i>Ips typographus</i>     | 11,196         | 41.44 | 30.01 | 71.45 | -0.16   | 15.26 | 13.28 | 28.55 | -0.07   |
| Average( <i>Ips</i> )      |                | 41.40 | 29.76 | 71.16 | -0.16   | 15.39 | 13.45 | 28.84 | -0.07   |
| rRNA                       |                |       |       |       |         |       |       |       |         |
| <i>Dendroctonus micans</i> | 2,137          | 43.61 | 36.17 | 79.78 | -0.09   | 6.69  | 13.52 | 20.22 | 0.34    |
| <i>Ips nitidus</i>         | 2,181          | 40.15 | 38.23 | 78.38 | -0.02   | 7.07  | 14.55 | 21.62 | 0.35    |
| <i>Ips shangrila</i>       | 2,201          | 40.80 | 37.30 | 78.10 | -0.04   | 6.93  | 14.97 | 21.90 | 0.37    |
| <i>Ips hauseri</i>         | 2,159          | 40.10 | 38.61 | 78.71 | -0.02   | 6.69  | 14.60 | 21.29 | 0.37    |
| <i>Ips duplicatus</i>      | 2,203          | 39.96 | 38.75 | 78.71 | -0.02   | 6.64  | 14.65 | 21.29 | 0.38    |
| <i>Ips subelongatus</i>    | 2,177          | 40.57 | 38.37 | 78.94 | -0.03   | 6.50  | 14.55 | 21.06 | 0.38    |
| <i>Ips typographus</i>     | 2,177          | 40.43 | 37.86 | 78.29 | -0.03   | 6.88  | 14.83 | 21.71 | 0.37    |
| Average( <i>Ips</i> )      |                | 40.34 | 38.18 | 78.52 | -0.03   | 6.79  | 14.69 | 21.48 | 0.37    |
| tRNA                       |                |       |       |       |         |       |       |       |         |
| <i>Dendroctonus micans</i> | 1,358          | 37.78 | 39.54 | 77.32 | 0.02    | 10.31 | 12.37 | 22.68 | 0.09    |
| <i>Ips nitidus</i>         | 1,444          | 36.23 | 40.35 | 76.58 | 0.05    | 10.24 | 13.18 | 23.42 | 0.13    |
| <i>Ips shangrila</i>       | 1,444          | 36.52 | 40.21 | 76.73 | 0.05    | 10.82 | 12.44 | 23.27 | 0.07    |
| <i>Ips hauseri</i>         | 1,438          | 36.89 | 38.95 | 75.85 | 0.03    | 10.16 | 13.99 | 24.15 | 0.16    |
| <i>Ips duplicatus</i>      | 1,429          | 36.52 | 39.40 | 75.92 | 0.04    | 10.38 | 13.70 | 24.08 | 0.14    |
| <i>Ips subelongatus</i>    | 1,431          | 37.26 | 40.43 | 77.69 | 0.04    | 9.94  | 12.37 | 22.31 | 0.11    |
| <i>Ips typographus</i>     | 1,439          | 35.57 | 40.43 | 75.99 | 0.06    | 10.90 | 13.11 | 24.01 | 0.09    |
| Average( <i>Ips</i> )      |                | 36.50 | 39.96 | 76.46 | 0.05    | 10.41 | 13.13 | 23.54 | 0.12    |

**Table S4.** Organization of the mitochondrial genome of *I. typographus*.

| Gene         | Direction | Start position | Stop position | Length | Anticodon | Start codon | Stop codon | IGS |
|--------------|-----------|----------------|---------------|--------|-----------|-------------|------------|-----|
| <i>trnQ</i>  | R         | 1              | 71            | 71     | CAT       |             |            |     |
| <i>trnM</i>  | F         | 86             | 157           | 72     | TTG       |             |            | 14  |
| <i>ND2</i>   | F         | 161            | 1168          | 1008   |           | ATA         | TAA        | 3   |
| <i>trnW</i>  | F         | 1169           | 1236          | 68     | TCA       |             |            | 0   |
| <i>trnC</i>  | R         | 1266           | 1332          | 67     | GCA       |             |            | 29  |
| <i>trnY</i>  | R         | 1338           | 1404          | 67     | GTA       |             |            | 5   |
| <i>COI</i>   | F         | 1429           | 2997          | 1569   |           | ATT         | TAA        | 24  |
| <i>trnL2</i> | F         | 3021           | 3089          | 69     | TAA       |             |            | 23  |
| <i>COII</i>  | F         | 3090           | 3770          | 681    |           | ATC         | TAA        | 0   |
| <i>trnK</i>  | F         | 3805           | 3876          | 72     | CTT       |             |            | 34  |
| <i>trnD</i>  | F         | 3893           | 3960          | 68     | GTC       |             |            | 16  |
| <i>ATP8</i>  | F         | 3961           | 4125          | 165    |           | ATC         | TAG        | 0   |
| <i>ATP6</i>  | F         | 4122           | 4799          | 678    |           | ATA         | TAA        | -4  |
| <i>COIII</i> | F         | 4805           | 5587          | 783    |           | ATG         | TAA        | 5   |
| <i>trnG</i>  | F         | 5614           | 5679          | 66     | TCC       |             |            | 26  |
| <i>ND3</i>   | F         | 5683           | 6033          | 351    |           | ATT         | TAA        | 3   |
| <i>trnA</i>  | F         | 6046           | 6114          | 69     | TGC       |             |            | 12  |
| <i>trnR</i>  | F         | 6136           | 6205          | 70     | TCG       |             |            | 21  |
| <i>trnN</i>  | F         | 6238           | 6303          | 66     | GTT       |             |            | 32  |
| <i>trnS1</i> | F         | 6304           | 6371          | 68     | GCT       |             |            | 0   |
| <i>trnE</i>  | F         | 6373           | 6443          | 71     | TTC       |             |            | 1   |
| <i>trnF</i>  | R         | 6448           | 6518          | 71     | GAA       |             |            | 4   |
| <i>ND5</i>   | R         | 6552           | 8297          | 1746   |           | ATT         | TAA        | 33  |
| <i>trnH</i>  | R         | 8298           | 8363          | 66     | GTG       |             |            | 0   |
| <i>ND4</i>   | R         | 8398           | 9735          | 1338   |           | ATG         | TAA        | 34  |
| <i>ND4L</i>  | R         | 9742           | 10029         | 288    |           | ATT         | TAA        | 6   |
| <i>trnT</i>  | F         | 10055          | 10121         | 67     | TGT       |             |            | 25  |
| <i>trnP</i>  | R         | 10122          | 10188         | 67     | TGG       |             |            | 0   |
| <i>ND6</i>   | F         | 10200          | 10697         | 498    |           | ATT         | TAA        | 11  |
| <i>CytB</i>  | F         | 10783          | 11925         | 1143   |           | ATA         | TAA        | 85  |
| <i>trnS2</i> | F         | 12028          | 12097         | 70     | TGA       |             |            | 102 |
| <i>ND1</i>   | R         | 12117          | 13064         | 948    |           | TTG         | TAA        | 19  |
| <i>trnL1</i> | R         | 13066          | 13134         | 69     | TAG       |             |            | 1   |
| <i>rrnL</i>  | R         | 13152          | 14516         | 1365   |           |             |            | 17  |
| <i>trnV</i>  | R         | 14510          | 14574         | 65     | TAC       |             |            | -7  |
| <i>rrnS</i>  | R         | 14573          | 15384         | 812    |           |             |            | -2  |

**Table S5.** Organization of the mitochondrial genome of *I. subelongatus*.

| Gene         | Direction | Start position | Stop position | Length | Anticodon | Start codon | Stop codon | IGS |
|--------------|-----------|----------------|---------------|--------|-----------|-------------|------------|-----|
| <i>trnQ</i>  | R         | 1              | 71            | 71     | TTG       |             |            |     |
| <i>trnM</i>  | F         | 140            | 210           | 71     | CAT       |             |            | 68  |
| <i>ND2</i>   | F         | 214            | 1221          | 1008   |           | ATA         | TAA        | 3   |
| <i>trnW</i>  | F         | 1223           | 1289          | 67     | TCA       |             |            | 1   |
| <i>trnC</i>  | R         | 1296           | 1359          | 64     | GCA       |             |            | 6   |
| <i>trnY</i>  | R         | 1373           | 1440          | 68     | GTA       |             |            | 13  |
| <i>COI</i>   | F         | 1452           | 2999          | 1548   |           | ATT         | TAA        | 11  |
| <i>trnL2</i> | F         | 3012           | 3079          | 68     | TAA       |             |            | 12  |
| <i>COII</i>  | F         | 3080           | 3760          | 681    |           | ATC         | TAA        | 0   |
| <i>trnK</i>  | F         | 3804           | 3874          | 71     | CTT       |             |            | 43  |
| <i>trnD</i>  | F         | 3880           | 3947          | 68     | GTC       |             |            | 5   |
| <i>ATP8</i>  | F         | 3948           | 4121          | 174    |           | ATT         | TAG        | 0   |
| <i>ATP6</i>  | F         | 4115           | 4795          | 681    |           | ATG         | TAA        | -7  |
| <i>COIII</i> | F         | 4820           | 5602          | 783    |           | ATG         | TAA        | 24  |
| <i>trnG</i>  | F         | 5630           | 5700          | 71     | TCC       |             |            | 27  |
| <i>ND3</i>   | F         | 5704           | 6054          | 351    |           | ATC         | TAA        | 3   |
| <i>trnA</i>  | F         | 6064           | 6128          | 65     | TGC       |             |            | 9   |
| <i>trnR</i>  | F         | 6147           | 6215          | 69     | TCG       |             |            | 18  |
| <i>trnN</i>  | F         | 6248           | 6314          | 67     | GTT       |             |            | 32  |
| <i>trnS1</i> | F         | 6315           | 6381          | 67     | GCT       |             |            | 0   |
| <i>trnE</i>  | F         | 6384           | 6448          | 65     | TTC       |             |            | 2   |
| <i>trnF</i>  | R         | 6456           | 6524          | 69     | GAA       |             |            | 7   |
| <i>ND5</i>   | R         | 6534           | 8276          | 1743   |           | ATT         | TAA        | 9   |
| <i>trnH</i>  | R         | 8277           | 8348          | 72     | GTG       |             |            | 0   |
| <i>ND4</i>   | R         | 8373           | 9710          | 1338   |           | ATG         | TAA        | 24  |
| <i>ND4L</i>  | R         | 9726           | 10019         | 294    |           | ATA         | TAA        | 15  |
| <i>trnT</i>  | F         | 10067          | 10133         | 67     | TGT       |             |            | 47  |
| <i>trnP</i>  | R         | 10134          | 10199         | 66     | TGG       |             |            | 0   |
| <i>ND6</i>   | F         | 10202          | 10711         | 510    |           | ATT         | TAA        | 2   |
| <i>CytB</i>  | F         | 10761          | 11897         | 1137   |           | ATG         | TAA        | 49  |
| <i>trnS2</i> | F         | 11912          | 11981         | 70     | TGA       |             |            | 14  |
| <i>ND1</i>   | R         | 12001          | 12948         | 948    |           | TTG         | TAA        | 19  |
| <i>trnL1</i> | R         | 12950          | 13018         | 69     | TAG       |             |            | 1   |
| <i>rrnL</i>  | R         | 13004          | 14367         | 1364   |           |             |            | -15 |
| <i>trnV</i>  | R         | 14383          | 14448         | 66     | TAC       |             |            | 15  |
| <i>rrnS</i>  | R         | 14447          | 15259         | 813    |           |             |            | -2  |



**Table S6.** Organization of the mitochondrial genome of *I. shangrila*.

| Gene         | Direction | Start position | Stop position | Length | Anticodon | Start codon | Stop codon | IGS |
|--------------|-----------|----------------|---------------|--------|-----------|-------------|------------|-----|
| <i>trnQ</i>  | R         | 1              | 70            | 70     | TTG       |             |            |     |
| <i>trnM</i>  | F         | 101            | 170           | 70     | CAT       |             |            | 30  |
| <i>ND2</i>   | F         | 171            | 1181          | 1011   |           | ATT         | TAA        | 0   |
| <i>trnW</i>  | F         | 1197           | 1265          | 69     | TCA       |             |            | 15  |
| <i>trnC</i>  | R         | 1344           | 1410          | 67     | GCA       |             |            | 78  |
| <i>trnY</i>  | R         | 1463           | 1528          | 66     | GTA       |             |            | 52  |
| <i>COI</i>   | F         | 1595           | 3139          | 1545   |           | TTA         | TAA        | 66  |
| <i>trnL2</i> | F         | 3150           | 3216          | 67     | TAA       |             |            | 10  |
| <i>COII</i>  | F         | 3217           | 3897          | 681    |           | ATC         | TAA        | 0   |
| <i>trnK</i>  | F         | 3929           | 4000          | 72     | CTT       |             |            | 31  |
| <i>trnD</i>  | F         | 4012           | 4080          | 69     | GTC       |             |            | 11  |
| <i>ATP8</i>  | F         | 4081           | 4248          | 168    |           | ATT         | TAG        | 0   |
| <i>ATP6</i>  | F         | 4245           | 4922          | 678    |           | ATA         | TAA        | -4  |
| <i>COIII</i> | F         | 4933           | 5715          | 783    |           | ATG         | TAA        | 10  |
| <i>trnG</i>  | F         | 5740           | 5813          | 74     | TCC       |             |            | 24  |
| <i>ND3</i>   | F         | 5817           | 6167          | 351    |           | ATT         | TAA        | 3   |
| <i>trnA</i>  | F         | 6173           | 6241          | 69     | TGC       |             |            | 5   |
| <i>trnR</i>  | F         | 6303           | 6372          | 70     | TCG       |             |            | 61  |
| <i>trnN</i>  | F         | 6413           | 6478          | 66     | GTT       |             |            | 40  |
| <i>trnS1</i> | F         | 6479           | 6548          | 70     | GCT       |             |            | 0   |
| <i>trnE</i>  | F         | 6551           | 6618          | 68     | TTC       |             |            | 2   |
| <i>trnF</i>  | R         | 6623           | 6687          | 65     | GAA       |             |            | 4   |
| <i>ND5</i>   | R         | 6704           | 8440          | 1737   |           | ATT         | TAA        | 16  |
| <i>trnH</i>  | R         | 8441           | 8509          | 69     | GTG       |             |            | 0   |
| <i>ND4</i>   | R         | 8543           | 9880          | 1338   |           | ATG         | TAA        | 33  |
| <i>ND4L</i>  | R         | 9899           | 10192         | 294    |           | ATA         | TAA        | 18  |
| <i>trnT</i>  | F         | 10253          | 10320         | 68     | TGT       |             |            | 60  |
| <i>trnP</i>  | R         | 10321          | 10387         | 67     | TGG       |             |            | 0   |
| <i>ND6</i>   | F         | 10402          | 10896         | 495    |           | ATT         | TAA        | 14  |
| <i>CytB</i>  | F         | 11062          | 12195         | 1134   |           | ATG         | TAA        | 165 |
| <i>trnS2</i> | F         | 12288          | 12360         | 73     | TGA       |             |            | 92  |
| <i>ND1</i>   | R         | 12382          | 13326         | 945    |           | ATT         | TAA        | 21  |
| <i>trnL1</i> | R         | 13331          | 13397         | 67     | TAG       |             |            | 4   |
| <i>rrnL</i>  | R         | 13383          | 14766         | 1384   |           |             |            | -15 |
| <i>trnV</i>  | R         | 14760          | 14827         | 68     | TAC       |             |            | -7  |
| <i>rrnS</i>  | R         | 14825          | 15641         | 817    |           |             |            | -3  |

**Table S7.** Organization of the mitochondrial genome of *I. duplicatus*.

| Gene         | Direction | Start position | Stop position | Length | Anticodon | Start codon | Stop codon | IGS |
|--------------|-----------|----------------|---------------|--------|-----------|-------------|------------|-----|
| <i>trnQ</i>  | R         | 1              | 69            | 69     | TTG       |             |            |     |
| <i>trnM</i>  | F         | 135            | 203           | 69     | CAT       |             |            | 65  |
| <i>ND2</i>   | F         | 204            | 1214          | 1011   |           | ATA         | TAA        | 0   |
| <i>trnW</i>  | F         | 1240           | 1306          | 67     | TCA       |             |            | 25  |
| <i>trnC</i>  | R         | 1324           | 1387          | 64     | GCA       |             |            | 17  |
| <i>trnY</i>  | R         | 1477           | 1547          | 71     | GTA       |             |            | 89  |
| <i>COI</i>   | F         | 1562           | 3106          | 1545   |           | ATC         | TAA        | 14  |
| <i>trnL2</i> | F         | 3102           | 3169          | 68     | TAA       |             |            | -5  |
| <i>COII</i>  | F         | 3170           | 3850          | 681    |           | ATT         | TAA        | 0   |
| <i>trnK</i>  | F         | 3902           | 3972          | 71     | CTT       |             |            | 51  |
| <i>trnD</i>  | F         | 4026           | 4094          | 69     | GTC       |             |            | 53  |
| <i>ATP8</i>  | F         | 4095           | 4268          | 174    |           | ATT         | TAG        | 0   |
| <i>ATP6</i>  | F         | 4262           | 4942          | 681    |           | ATG         | TAA        | -7  |
| <i>COIII</i> | F         | 4952           | 5734          | 783    |           | ATG         | TAA        | 9   |
| <i>trnG</i>  | F         | 5816           | 5886          | 71     | TCC       |             |            | 81  |
| <i>ND3</i>   | F         | 5887           | 6240          | 354    |           | ATT         | TAA        | 0   |
| <i>trnA</i>  | F         | 6251           | 6316          | 66     | TGC       |             |            | 10  |
| <i>trnR</i>  | F         | 6331           | 6399          | 69     | TCG       |             |            | 14  |
| <i>trnN</i>  | F         | 6434           | 6499          | 66     | GTT       |             |            | 34  |
| <i>trnS1</i> | F         | 6500           | 6567          | 68     | GCT       |             |            | 0   |
| <i>trnE</i>  | F         | 6570           | 6635          | 66     | TTC       |             |            | 2   |
| <i>trnF</i>  | R         | 6711           | 6779          | 69     | GAA       |             |            | 75  |
| <i>ND5</i>   | R         | 6834           | 8541          | 1708   |           | ATC         | T-         | 54  |
| <i>trnH</i>  | R         | 8542           | 8611          | 70     | GTG       |             |            | 0   |
| <i>ND4</i>   | R         | 8624           | 9961          | 1338   |           | ATG         | TAG        | 12  |
| <i>ND4L</i>  | R         | 9974           | 10267         | 294    |           | ATA         | TAG        | 12  |
| <i>trnT</i>  | F         | 10285          | 10351         | 67     | TGT       |             |            | 17  |
| <i>trnP</i>  | R         | 10352          | 10418         | 67     | TGG       |             |            | 0   |
| <i>ND6</i>   | F         | 10442          | 10927         | 486    |           | ATC         | TAA        | 23  |
| <i>CytB</i>  | F         | 10983          | 12122         | 1140   |           | ATG         | TAA        | 55  |
| <i>trnS2</i> | F         | 12231          | 12299         | 69     | TGA       |             |            | 108 |
| <i>ND1</i>   | R         | 12327          | 13268         | 942    |           | ATT         | TAA        | 27  |
| <i>trnL1</i> | R         | 13273          | 13341         | 69     | TAG       |             |            | 4   |
| <i>rrnL</i>  | R         | 13317          | 14717         | 1401   |           |             |            | -25 |
| <i>trnV</i>  | R         | 14706          | 14772         | 67     | TAC       |             |            | -12 |
| <i>rrnS</i>  | R         | 14771          | 15572         | 802    |           |             |            | -2  |

**Table S8.** Organization of the mitochondrial genome of *I. hauseri*.

| Gene         | Direction | Start position | Stop position | Length | Anticodon | Start codon | Stop codon | IGS |
|--------------|-----------|----------------|---------------|--------|-----------|-------------|------------|-----|
| <i>trnQ</i>  | R         | 1              | 70            | 70     | TTG       |             |            |     |
| <i>trnM</i>  | F         | 123            | 193           | 71     | CAT       |             |            | 52  |
| <i>ND2</i>   | F         | 194            | 1204          | 1011   |           | ATA         | TAA        | 0   |
| <i>trnW</i>  | F         | 1226           | 1292          | 67     | TCA       |             |            | 21  |
| <i>trnC</i>  | R         | 1309           | 1373          | 65     | GCA       |             |            | 16  |
| <i>trnY</i>  | R         | 1439           | 1506          | 68     | GTA       |             |            | 65  |
| <i>COI</i>   | F         | 1470           | 3050          | 1581   |           | ATT         | TAA        | -37 |
| <i>trnL2</i> | F         | 3046           | 3113          | 68     | TAA       |             |            | -5  |
| <i>COII</i>  | F         | 3114           | 3794          | 681    |           | ATT         | TAA        | 0   |
| <i>trnK</i>  | F         | 3835           | 3905          | 71     | CTT       |             |            | 40  |
| <i>trnD</i>  | F         | 3951           | 4019          | 69     | GTC       |             |            | 45  |
| <i>ATP8</i>  | F         | 4020           | 4190          | 171    |           | ATC         | TAG        | 0   |
| <i>ATP6</i>  | F         | 4184           | 4864          | 681    |           | ATG         | TAA        | -7  |
| <i>COIII</i> | F         | 4876           | 5658          | 783    |           | ATG         | TAA        | 11  |
| <i>trnG</i>  | F         | 5714           | 5783          | 70     | TCC       |             |            | 55  |
| <i>ND3</i>   | F         | 5784           | 6137          | 354    |           | ATT         | TAA        | 0   |
| <i>trnA</i>  | F         | 6150           | 6218          | 69     | TGC       |             |            | 12  |
| <i>trnR</i>  | F         | 6317           | 6386          | 70     | TCG       |             |            | 98  |
| <i>trnN</i>  | F         | 6418           | 6483          | 66     | GTT       |             |            | 31  |
| <i>trnS1</i> | F         | 6484           | 6551          | 6      | GCT       |             |            | 0   |
| <i>trnE</i>  | F         | 6554           | 6621          | 68     | TTC       |             |            | 2   |
| <i>trnF</i>  | R         | 6656           | 6723          | 68     | GAA       |             |            | 34  |
| <i>ND5</i>   | R         | 6781           | 8488          | 1708   |           | ATC         | T-         | 57  |
| <i>trnH</i>  | R         | 8489           | 8557          | 69     | GTG       |             |            | 0   |
| <i>ND4</i>   | R         | 8570           | 9907          | 1338   |           | ATG         | TAA        | 12  |
| <i>ND4L</i>  | R         | 9921           | 10214         | 294    |           | ATA         | TAG        | 13  |
| <i>trnT</i>  | F         | 10231          | 10297         | 67     | TGT       |             |            | 16  |
| <i>trnP</i>  | R         | 10298          | 10365         | 68     | TGG       |             |            | 0   |
| <i>ND6</i>   | F         | 10377          | 10874         | 498    |           | ATT         | TAA        | 11  |
| <i>CytB</i>  | F         | 10924          | 12063         | 1140   |           | ATG         | TAA        | 49  |
| <i>trnS2</i> | F         | 12172          | 12240         | 69     | TGA       |             |            | 108 |
| <i>ND1</i>   | R         | 12276          | 13212         | 937    |           | TTG         | T          | 35  |
| <i>trnL1</i> | R         | 13214          | 13283         | 70     | TAG       |             |            | 1   |
| <i>rrnL</i>  | R         | 13300          | 14660         | 1361   |           |             |            | 16  |
| <i>trnV</i>  | R         | 14654          | 14720         | 67     | TAC       |             |            | -7  |
| <i>rrnS</i>  | R         | 14719          | 15516         | 798    |           |             |            | -2  |

**Table S9.** Organization of the mitochondrial genome of *I. nitidus*.

| Gene         | Direction | Start position | Stop position | Length | Anticodon | Start codon | Stop codon | IGS |
|--------------|-----------|----------------|---------------|--------|-----------|-------------|------------|-----|
| <i>trnQ</i>  | R         | 1              | 71            | 71     | TTG       |             |            |     |
| <i>trnM</i>  | F         | 87             | 159           | 73     | CAT       |             |            | 15  |
| <i>ND2</i>   | F         | 163            | 1170          | 1008   |           | ATA         | TAA        | 3   |
| <i>trnW</i>  | F         | 1171           | 1238          | 68     | TCA       |             |            | 0   |
| <i>trnC</i>  | R         | 1264           | 1333          | 70     | GCA       |             |            | 25  |
| <i>trnY</i>  | R         | 1340           | 1406          | 67     | GTA       |             |            | 6   |
| <i>COI</i>   | F         | 1444           | 3003          | 1560   |           | ATC         | TAA        | 37  |
| <i>trnL2</i> | F         | 3023           | 3091          | 69     | TAA       |             |            | 19  |
| <i>COII</i>  | F         | 3092           | 3772          | 681    |           | ATC         | TAA        | 0   |
| <i>trnK</i>  | F         | 3803           | 3874          | 72     | CTT       |             |            | 30  |
| <i>trnD</i>  | F         | 3891           | 3958          | 68     | GTC       |             |            | 16  |
| <i>ATP8</i>  | F         | 3959           | 4123          | 165    |           | ATT         | TAG        | 0   |
| <i>ATP6</i>  | F         | 4120           | 4797          | 678    |           | ATA         | TAA        | -4  |
| <i>COIII</i> | F         | 4803           | 5585          | 783    |           | ATG         | TAA        | 5   |
| <i>trnG</i>  | F         | 5611           | 5676          | 66     | TCC       |             |            | 25  |
| <i>ND3</i>   | F         | 5677           | 6030          | 354    |           | ATT         | TAA        | 0   |
| <i>trnA</i>  | F         | 6042           | 6110          | 69     | TGC       |             |            | 11  |
| <i>trnR</i>  | F         | 6132           | 6201          | 70     | TCG       |             |            | 21  |
| <i>trnN</i>  | F         | 6234           | 6299          | 66     | GTT       |             |            | 32  |
| <i>trnS1</i> | F         | 6300           | 6367          | 68     | GCT       |             |            | 0   |
| <i>trnE</i>  | F         | 6369           | 6440          | 72     | TTC       |             |            | 1   |
| <i>trnF</i>  | R         | 6445           | 6516          | 72     | GAA       |             |            | 4   |
| <i>ND5</i>   | R         | 6542           | 8287          | 1746   |           | ATT         | TAA        | 25  |
| <i>trnH</i>  | R         | 8288           | 8353          | 66     | GTG       |             |            | 0   |
| <i>ND4</i>   | R         | 8393           | 9730          | 1338   |           | ATG         | TAA        | 39  |
| <i>ND4L</i>  | R         | 9737           | 10024         | 288    |           | ATT         | TAA        | 6   |
| <i>trnT</i>  | F         | 10051          | 10117         | 67     | TGT       |             |            | 26  |
| <i>trnP</i>  | R         | 10118          | 10184         | 67     | TGG       |             |            | 0   |
| <i>ND6</i>   | F         | 10196          | 10693         | 498    |           | ATT         | TAA        | 11  |
| <i>CytB</i>  | F         | 10784          | 11926         | 1143   |           | ATA         | TAA        | 90  |
| <i>trnS2</i> | F         | 12049          | 12118         | 70     | TGA       |             |            | 122 |
| <i>ND1</i>   | R         | 12138          | 13085         | 948    |           | TTG         | TAA        | 19  |
| <i>trnL1</i> | R         | 13087          | 13155         | 69     | TAG       |             |            | 1   |
| <i>rrnL</i>  | R         | 13173          | 14536         | 1364   |           |             |            | 17  |
| <i>trnV</i>  | R         | 14530          | 14594         | 65     | TAC       |             |            | -7  |
| <i>rrnS</i>  | R         | 14593          | 15409         | 817    |           |             |            | -2  |

**Table S10.** Organization of the mitochondrial genome of *D. micans*.

| Gene         | Direction | Start position | Stop position | Length | Anticodon | Start codon | Stop codon | IGS |
|--------------|-----------|----------------|---------------|--------|-----------|-------------|------------|-----|
| <i>trnQ</i>  | R         | 1              | 70            | 70     | TTG       |             |            |     |
| <i>trnM</i>  | F         | 81             | 150           | 70     | CAT       |             |            | 10  |
| <i>ND2</i>   | F         | 151            | 1150          | 1000   |           | ATT         | T          | 0   |
| <i>trnW</i>  | F         | 1172           | 1235          | 64     | TCA       |             |            | 21  |
| <i>trnC</i>  | R         | 1235           | 1296          | 62     | GCA       |             |            | -1  |
| <i>trnY</i>  | R         | 1300           | 1362          | 63     | GTA       |             |            | 3   |
| <i>COI</i>   | F         | 1355           | 2899          | 1545   |           | ATT         | TAA        | -8  |
| <i>trnL2</i> | F         | 2895           | 2959          | 65     | TAA       |             |            | -5  |
| <i>COII</i>  | F         | 2960           | 3643          | 684    |           | ATT         | TAA        | 0   |
| <i>trnK</i>  | F         | 3645           | 3715          | 71     | CTT       |             |            | 1   |
| <i>trnD</i>  | F         | 3716           | 3779          | 64     | GTC       |             |            | 0   |
| <i>ATP8</i>  | F         | 3780           | 3935          | 156    |           | ATA         | TAG        | 0   |
| <i>ATP6</i>  | F         | 3982           | 4600          | 619    |           | ATA         | TAA        | 46  |
| <i>COIII</i> | F         | 4606           | 5388          | 783    |           | ATG         | TAA        | 5   |
| <i>trnG</i>  | F         | 5395           | 5458          | 64     | TCC       |             |            | 6   |
| <i>ND3</i>   | F         | 5459           | 5812          | 354    |           | ATT         | TAG        | 0   |
| <i>trnA</i>  | F         | 5811           | 5871          | 61     | TGC       |             |            | -2  |
| <i>trnR</i>  | F         | 5870           | 5936          | 67     | TCG       |             |            | -2  |
| <i>trnN</i>  | F         | 5935           | 6000          | 66     | GTT       |             |            | -2  |
| <i>trnS1</i> | F         | 6001           | 6065          | 65     | GCT       |             |            | 0   |
| <i>trnE</i>  | F         | 6065           | 6127          | 63     | TTC       |             |            | -1  |
| <i>trnF</i>  | R         | 6126           | 6188          | 63     | GAA       |             |            | -2  |
| <i>ND5</i>   | R         | 6192           | 7896          | 1705   |           | ATT         | T          | 3   |
| <i>trnH</i>  | R         | 7897           | 7957          | 61     | GTG       |             |            | 0   |
| <i>ND4</i>   | R         | 7941           | 9284          | 1344   |           | ATA         | TAA        | -17 |
| <i>ND4L</i>  | R         | 9281           | 9577          | 297    |           | ATG         | TAA        | -4  |
| <i>trnT</i>  | F         | 9581           | 9643          | 63     | TGT       |             |            | 3   |
| <i>trnP</i>  | R         | 9644           | 9706          | 63     | TGG       |             |            | 0   |
| <i>ND6</i>   | F         | 9709           | 10212         | 504    |           | ATT         | TAA        | 2   |
| <i>CytB</i>  | F         | 10215          | 11351         | 1137   |           | ATA         | TAA        | 2   |
| <i>trnS2</i> | F         | 11354          | 11418         | 65     | TGA       |             |            | 2   |
| <i>ND1</i>   | R         | 11436          | 12383         | 948    |           | TTG         | TAG        | 17  |
| <i>trnL1</i> | R         | 12385          | 12446         | 62     | TAG       |             |            | 1   |
| <i>rrnL</i>  | R         | 12409          | 13742         | 1334   |           |             |            | -38 |
| <i>trnV</i>  | R         | 13741          | 13806         | 66     | TAC       |             |            | -2  |
| <i>rrnS</i>  | R         | 13804          | 14607         | 804    |           |             |            | -3  |

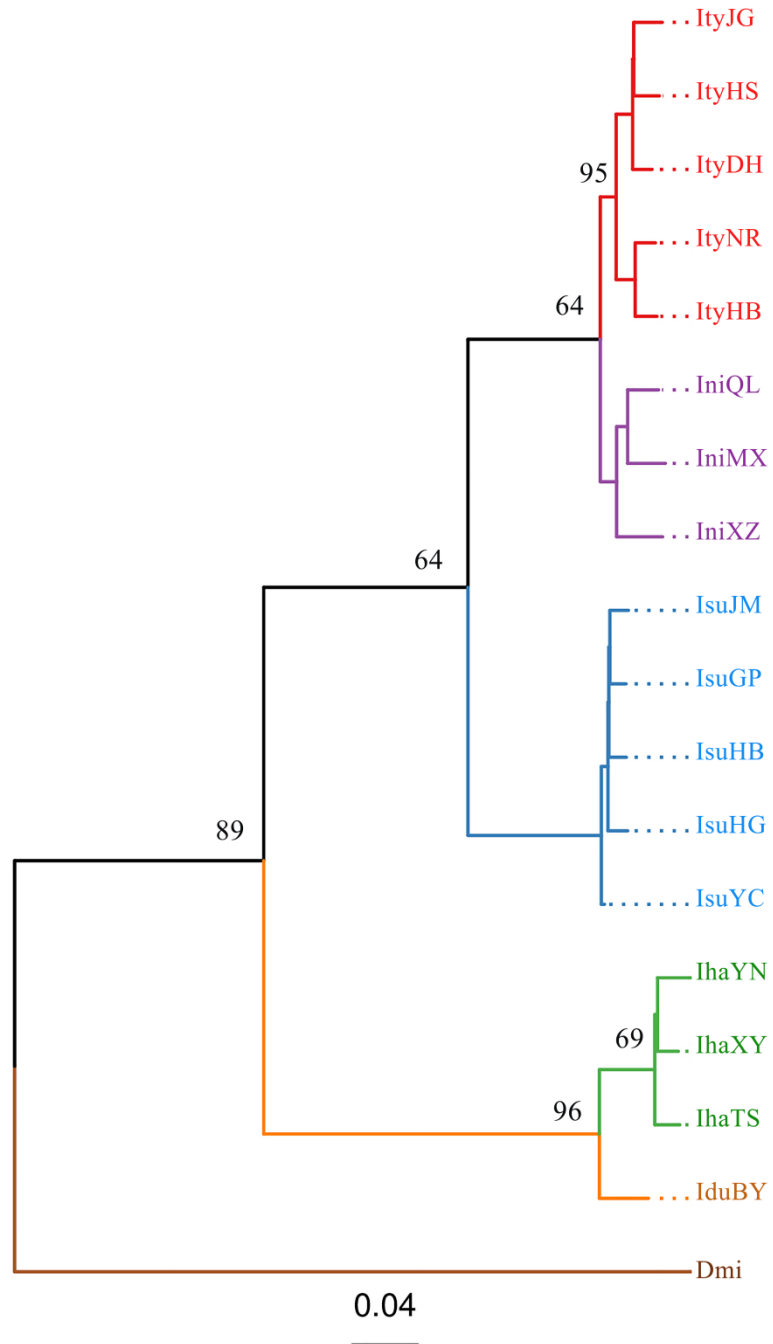

**Figure S1.** Phylogenetic tree (ML) of *Ips* geographic populations based on SNP. Numbers above or below branches indicate bootstrap values.

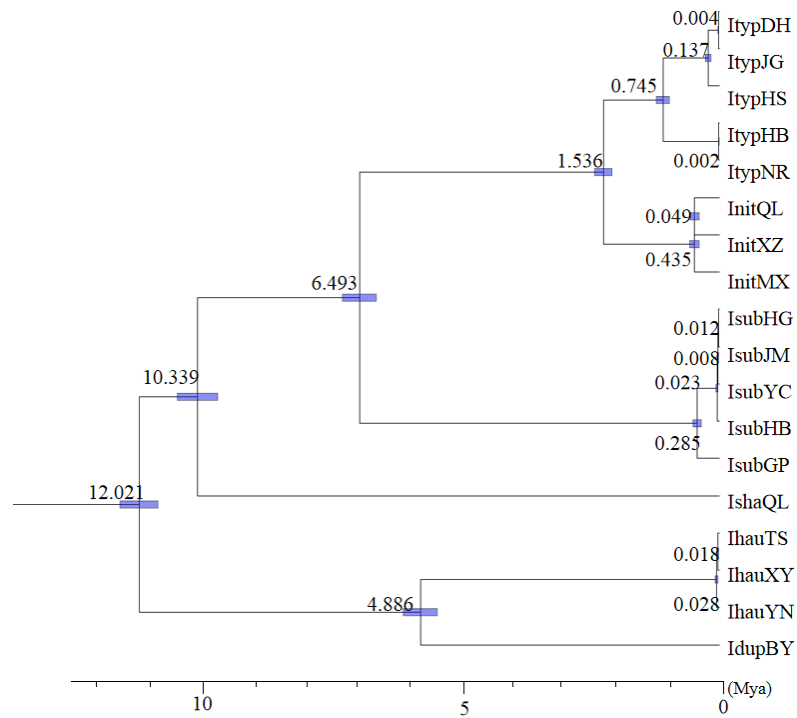

**Figure S2.** Tree of divergence times tree of the *Ips* species/populations.

Numbers above branches indicate the divergence time (in million years) of the branches. The middle solid line indicates the mean population size, and the gray area below and above the solid line indicates the 95% confidence interval.

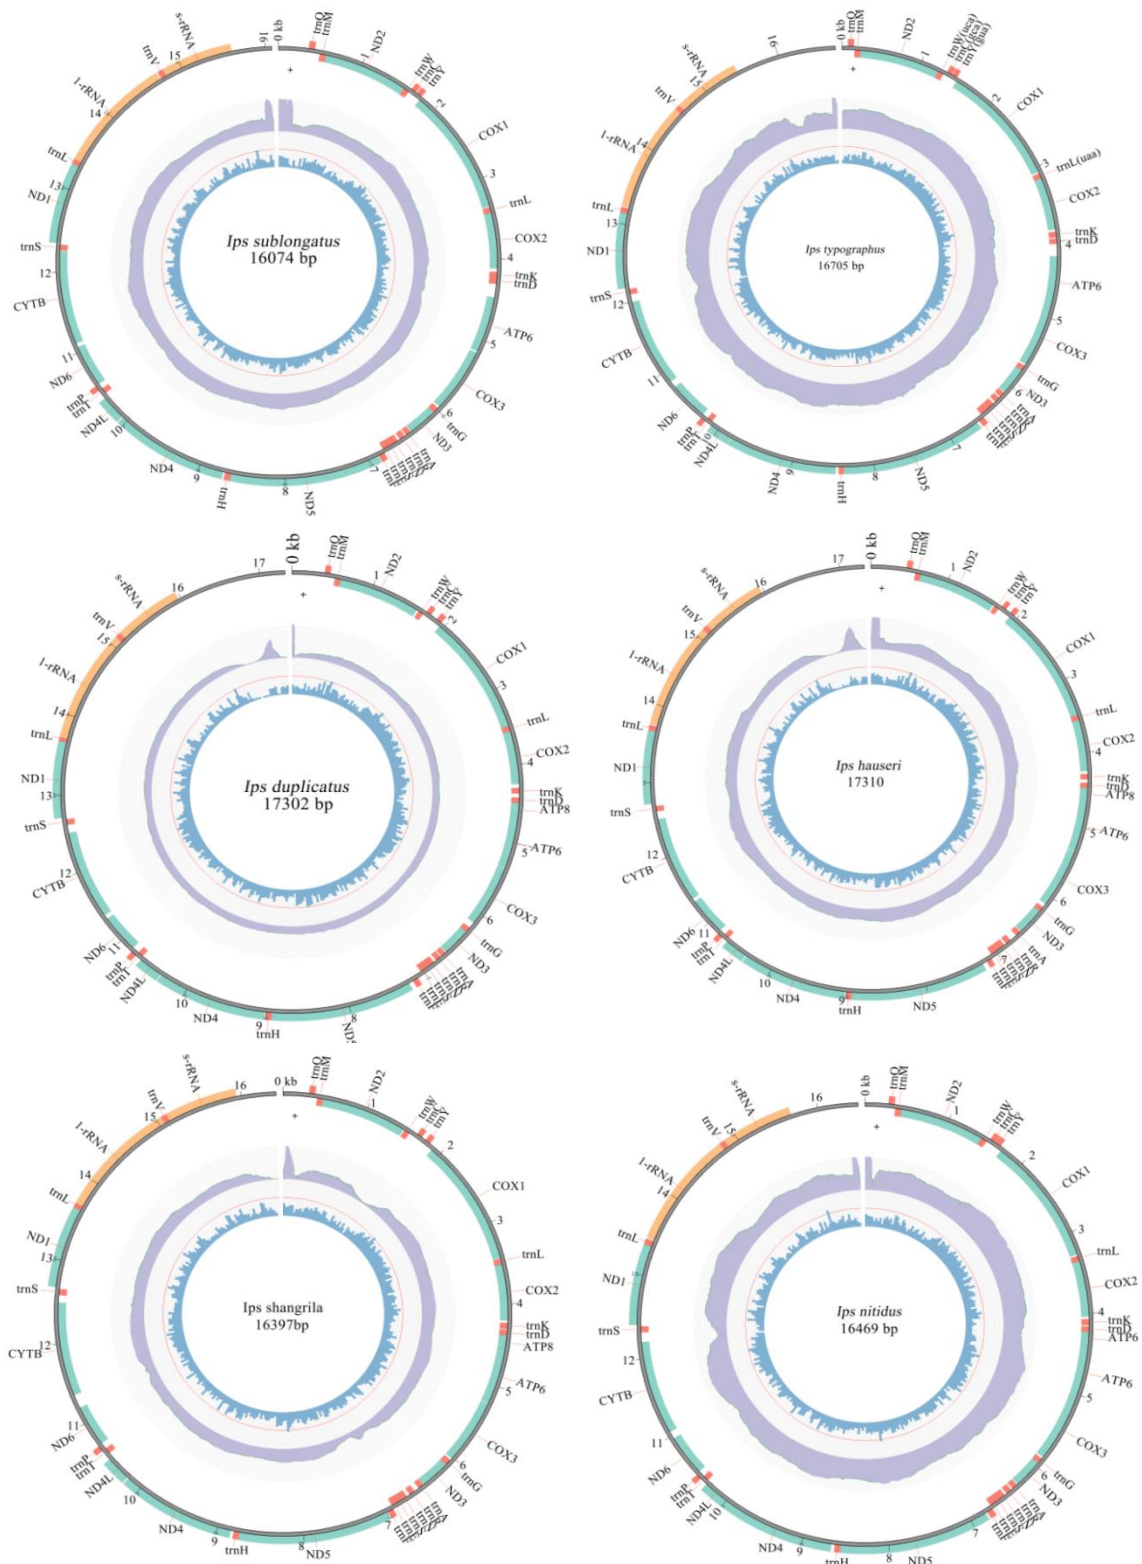

**Figure S3.** Circular maps of six newly sequenced bark beetles. The genes that were transcribed clockwise are shown outside the circle, while genes that were transcribed counterclockwise are shown inside the circle.



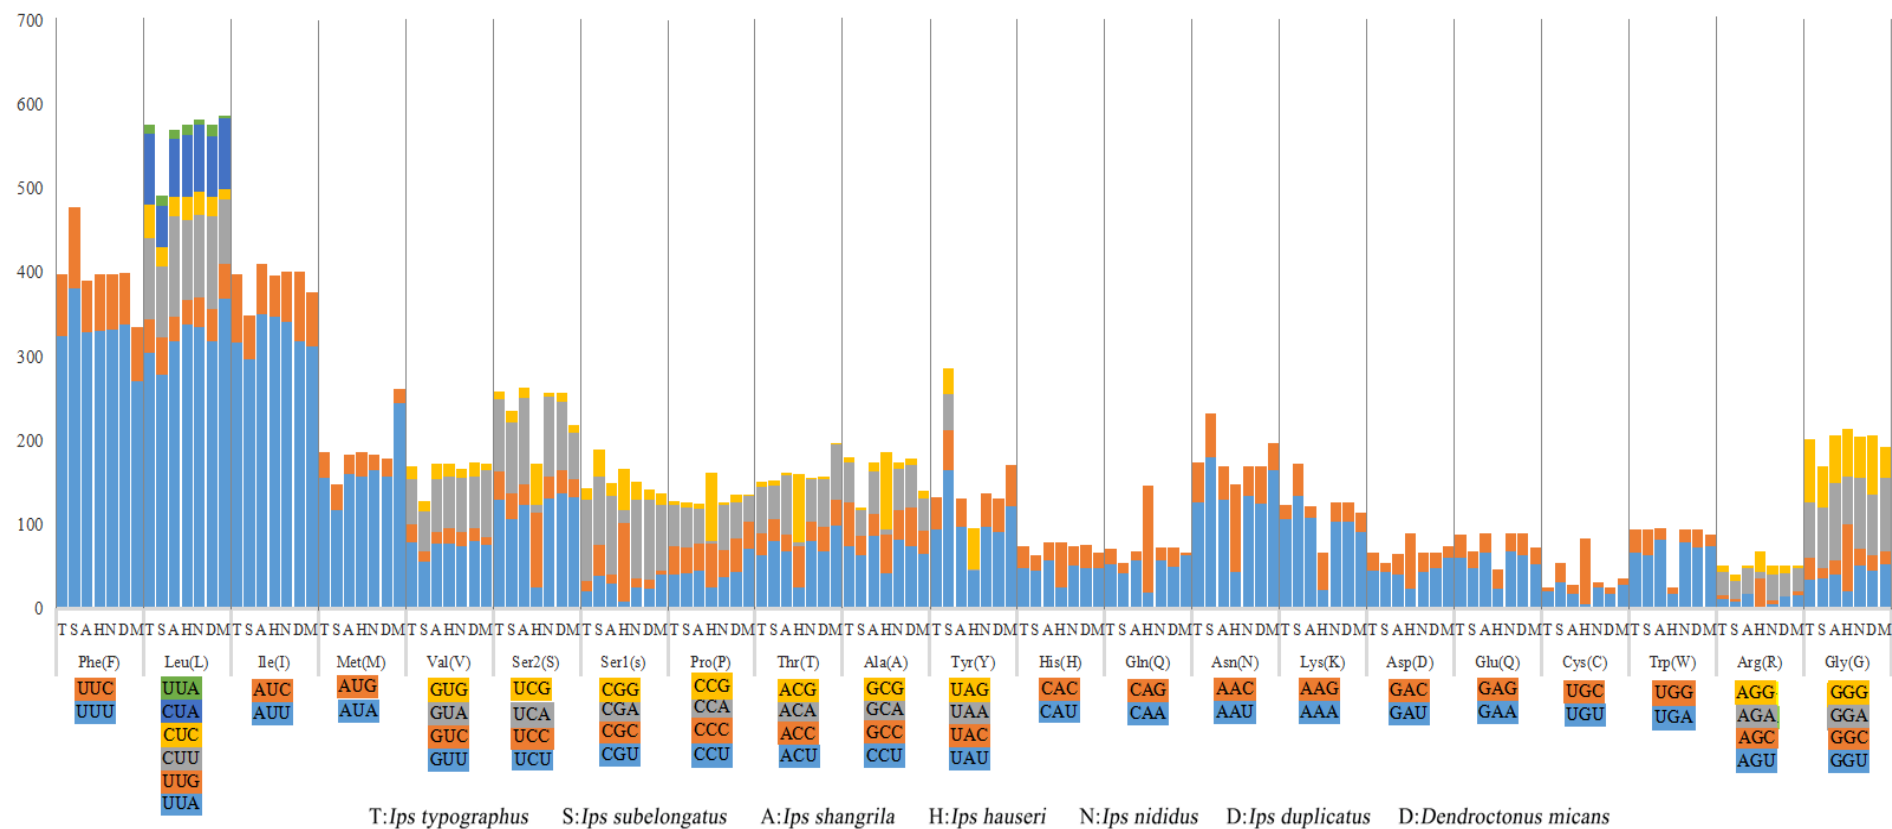

**Figure S4.** Amino acid usage of protein-coding genes of the mitochondrial genome in the genus *Ips*.
